# Supplementary material
Source: ML conference proceedings conference paper supplement (https://openaccess.thecvf.com/content/cvpr_2015/html/Heilbron_ActivityNet_A_Large-Scale_2015_CVPR_paper.html)
Supplement: Supplementary file 2 [file Heilbron_ActivityNet_A_Large-Scale_2015_CVPR_supplemental.zip]

# ActivityNet: A Large-Scale Video Benchmark for Human Activity Understanding

## – Supplementary material –

Fabian Caba Heilbron<sup>1,2</sup>, Victor Escorcia<sup>1,2</sup>, Bernard Ghanem<sup>2</sup> and Juan Carlos Nieves<sup>1</sup>

<sup>1</sup>Universidad del Norte, Colombia

<sup>2</sup>King Abdullah University of Science and Technology (KAUST), Saudi Arabia

### Abstract

*In this supplementary material, we complement our paper submission by providing additional analysis and results. First, we describe our taxonomy with more detail, providing the full hierarchy of ActivityNet. We also present screenshots of the crowdsourced annotation tools, and further statistics about data collection and annotation. Finally, we present more detailed results for the activity detection benchmark task.*

## 1. Complete ActivityNet taxonomy

Figure 1 shows the full organizational taxonomy behind ActivityNet. In the main manuscript, Figure 3 only illustrates the sub-tree under *Household Activities* due to space restrictions. Here, we observe that ActivityNet organizes many more human activities under the sub-trees *Personal Care*, *Work-related Activities*, *Sports*, *Exercise and Recreation*, *Socializing*, *Relaxing and Leisure*, *Eating and Drinking* and *Caring and Helping*. In the current version, 203 categories are included in ActivityNet. This illustrates the high diversity in activity categories included in ActivityNet. The rich structure of our taxonomy is an important asset for algorithms that may exploit such information in activity analysis.

## 2. Collection and Annotation details

We illustrate the user interfaces for crowdsourced verification and temporal trimming of the human activities of interest.

**Verifying videos** Given a set of potential videos, we create tasks with batches of 15 videos which are sent to AMT workers. Figure 2 shows the instructions (2a) and the annotation interface (2b) provided to the turkers. In the instructions panel, we provide positive and negative examples that illustrate workers how to correctly perform the tasks. As shown, the task is designed to minimize worker effort.

**Temporal trimming** Figure 3 shows the user interface for annotating the temporal intervals that depict instances

of the activity of interest. Users can easily navigate through the video and visualize the starting and ending frames of an activity instance. In order to promote consistency among annotations from different workers, we give a detailed description on how to annotate an activity instance.

## 3. Activity Detection: Precision-recall curves

Figure 4 shows example results of the activity detection task. We present the precision-recall curves for the four easiest (a-d) and hardest (e-h) classes. We find that activities with unclear temporal boundaries and those that contain complex human-object interactions are most difficult to detect. For example, the activity *Fixing mailbox* could include an interaction with a hammer or not. In contrast, activities related to sports tend to be confined to a temporal segment and usually involve similar scenarios and similar objects. In the case of *Pole vault* the movements of the athlete tend to be highly structured and a flexible pole is always present in the video.

## 4. Complexity analysis

In this section, we report the time required for computing visual features from the ActivityNet videos. As shown in Table 4, computing motion features requires about 6 years of processing in a single modern CPU core. This evidences the need for novel algorithms that provide efficient video description and feature extraction.

| Feature type | Codebook | Extraction | Encoding | Total |
|--------------|----------|------------|----------|-------|
| MF           | 144      | 50400      | 480      | 51024 |
| DF           | NA       | 84         | NA       | 84    |
| SF           | 42       | 2050       | 103      | 2195  |
| MF+DF+SF     | 186      | 52534      | 583      | 53303 |

Table 1: Time in hours spent on feature computation. It includes the time required to save the data on disk.



Find videos about: Shaving

### Instructions

Watch the videos and judge if an specific action occurs. If there is not visual evidence of action execution, you must mark the video as Non-Related. Please see both the good and bad examples for the action that correspond to your HIT. Keep in mind that we will reject HITs that do not follow the instructions.

### Good Examples

The following videos are examples does contain an actor performing the action **Shaving** :

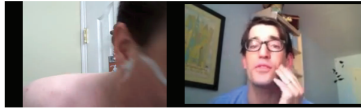

### Bad Examples

The following videos are examples does not contain visual evidence for the action **Shaving** .

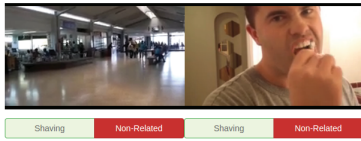

Tips:  
Do you want know what **Shaving** is?

Click to start

(a) Instructions for verifying activities

## Beat the machine

Please help us to find videos where an actor is performing the action **Shaving** .

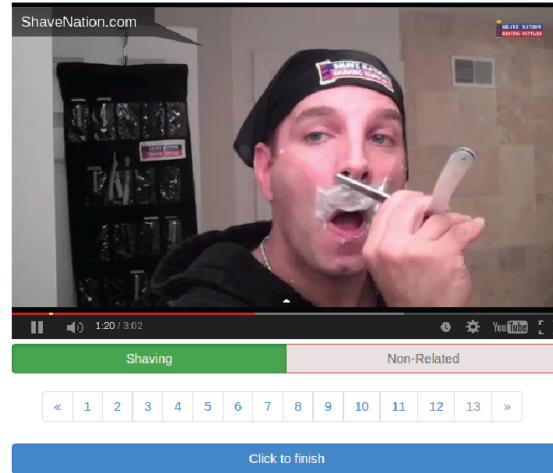

(b) User interface for annotating presence of activities

Figure 2: User interface for verifying human activities.

## Important Instructions

Dismiss Instructions

In this task, we ask you to annotate a video. You are to select a time interval around an interest human activity in the video.

### How We Accept Your Work

We will hand review your work and we will only accept high quality work. Your annotations are not compared against other workers. Follow these guidelines to ensure your work is accepted:

### Tips

Your annotations must be highly accurate. Refer to these guidelines and tutorial video:

- **Activity Start:** The activity begins when the person who will carry the object, makes contact with the object. If someone is carrying an object that is initially occluded, the activity begins when the object is visible.
- **Activity End:** The activity ends when the person is no longer supporting the object against gravity, and contact with the object is broken. In the event of an occlusion, it ends when the loss of contact is visible.

(a) Instructions for trimming activities

## Human Activities Crawler

### Beat the machine

Please help us to find the starting and ending frames for instances of the following activity:

**Ping-pong:** Ping-pong is a game played between two players using a lightweight ball and a table tennis racket. The game takes place on a table divided by a net. Except for the initial serve, players must allow the ball to bounce twice on their side of the table and must return it to the opposite side. Play is fast and demands quick reactions.

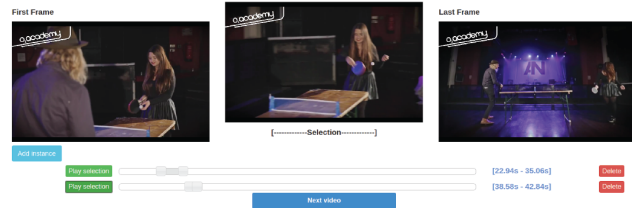

(b) User interface for trimming activity instances

Figure 3: User interface for temporal annotation of human activity instances.

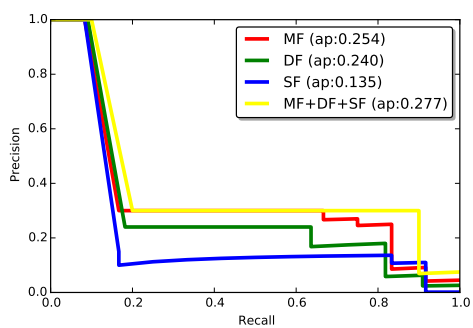

(a) Pole vault

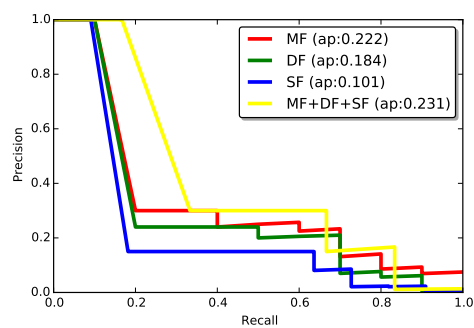

(b) Platform diving

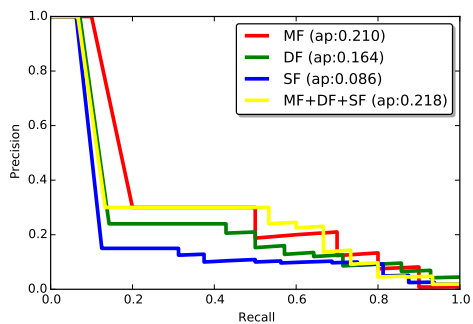

(c) Playing guitar

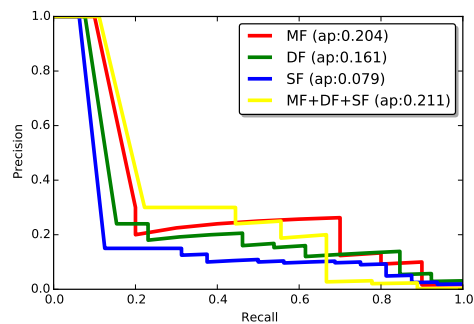

(d) Washing hands

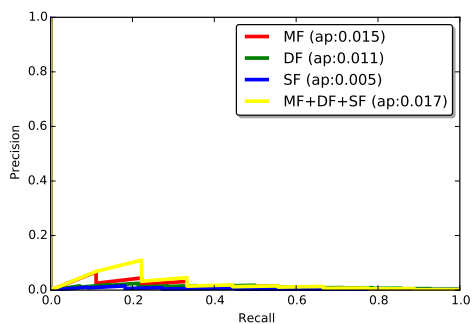

(e) Fixing mailbox

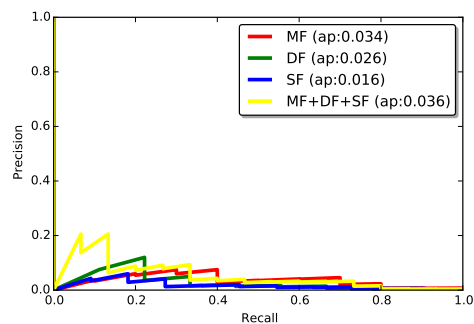

(f) Shoveling snow

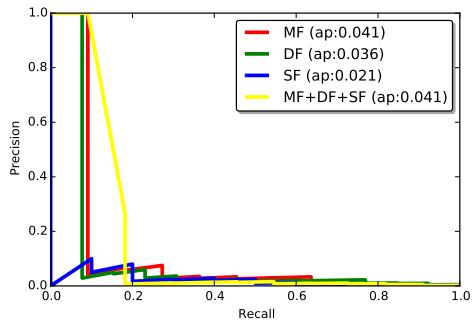

(g) Organizing file cabinet

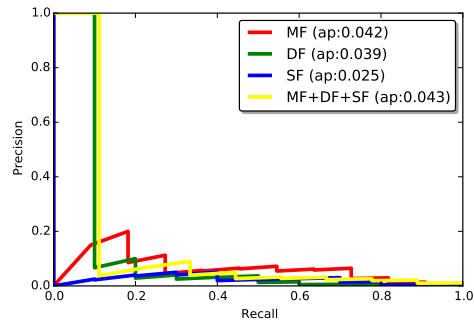

(h) Preparing shower for a child

Figure 4: Detection results.
