# Supplementary material
Source: ML conference proceedings conference paper supplement (https://openaccess.thecvf.com/content/cvpr_2015/html/Heilbron_ActivityNet_A_Large-Scale_2015_CVPR_paper.html)
Supplement: Supplementary file 3 [file Heilbron_ActivityNet_A_Large-Scale_2015_CVPR_supplemental.zip]

Archive with 4 entries (3 files):
- 0083-supp.mp4
- 0083-supp.pdf
- __MACOSX/
- __MACOSX/._0083-supp.pdf
